# Supplementary material for: An Adrenalectomy Mouse Model Reflecting Clinical Features for Chronic Fatigue Syndrome
Source: PubMed Central journal article supplement (PMC7023174; doi:10.3390/biom10010071), 2020-01-01

## Supplementary Material

### Material and Methods

#### Sample preparation

All mice were sacrificed under CO<sub>2</sub> anesthesia through removal of blood from an abdominal vein. A partial blood sample was used for complete blood count analysis using hematological autoanalyzer (Exigo EOS Vet, Boule Medical AB, Sweden).

### Results

#### Body weights

The body weights between sham and ADX groups were not significantly changed during 7 days (Supplementary Figure 2).

#### Hematological parameters

The blood cell population was changed by LPS and poly I:C injection. The LPS significantly reduced absolute WBC count [ $F(3,20) = 7.840, p < 0.01$ ] compared with the vehicle ( $p < 0.05$  or  $p < 0.01$ ). Its components including lymphocyte [ $F(3,20) = 22.859, p < 0.01$ ], monocyte [ $F(3,20) = 8.266, p < 0.01$ ], and granulocyte [ $F(3,20) = 20.796, p < 0.01$ ] were significantly altered by LPS and poly I:C injection ( $p < 0.05$  or  $p < 0.01$ , Supplementary Table 1). Absolute and percentage of blood cells were not affected by ADX compared with both the vehicle and sham group.

**Supplementary Table S1.** Hematological parameters in the blood of mice.

| Treatment                    | Vehicle      | LPS             | Poly I:C       | Sham         | ADX          |
|------------------------------|--------------|-----------------|----------------|--------------|--------------|
| RBC<br>(10 <sup>12</sup> /L) | 7.98 ± 0.27  | 7.79 ± 0.46     | 7.69 ± 0.49    | 7.36 ± 0.31  | 7.79 ± 0.44  |
| Hemoglobin<br>(g/dL)         | 14.42 ± 0.29 | 14.05 ± 0.79    | 14.01 ± 0.84   | 12.21 ± 0.35 | 14.12 ± 1.01 |
| WBC<br>(10 <sup>9</sup> /L)  | 14.28 ± 2.29 | 5.53 ± 1.73**   | 12.86 ± 2.44   | 13.51 ± 2.63 | 11.65 ± 5.69 |
| Lymphocyte<br>(%)            | 65.85 ± 2.64 | 31.45 ± 12.83** | 43.50 ± 14.11* | 66.26 ± 4.00 | 70.92 ± 6.19 |
| Monocyte<br>(%)              | 6.50 ± 0.28  | 10.60 ± 2.90*   | 8.76 ± 1.51*   | 7.38 ± 0.51  | 6.70 ± 0.71  |
| Granulocyte<br>(%)           | 27.65 ± 2.77 | 57.95 ± 12.22** | 47.74 ± 12.99* | 26.36 ± 3.55 | 22.38 ± 5.59 |

Data are expressed as the mean ± SD (n = 6) \*P < 0.05, \*\*P < 0.01 compared with the vehicle group. RBC, red blood cell; WBC, white blood cell

## Supplementary Figures

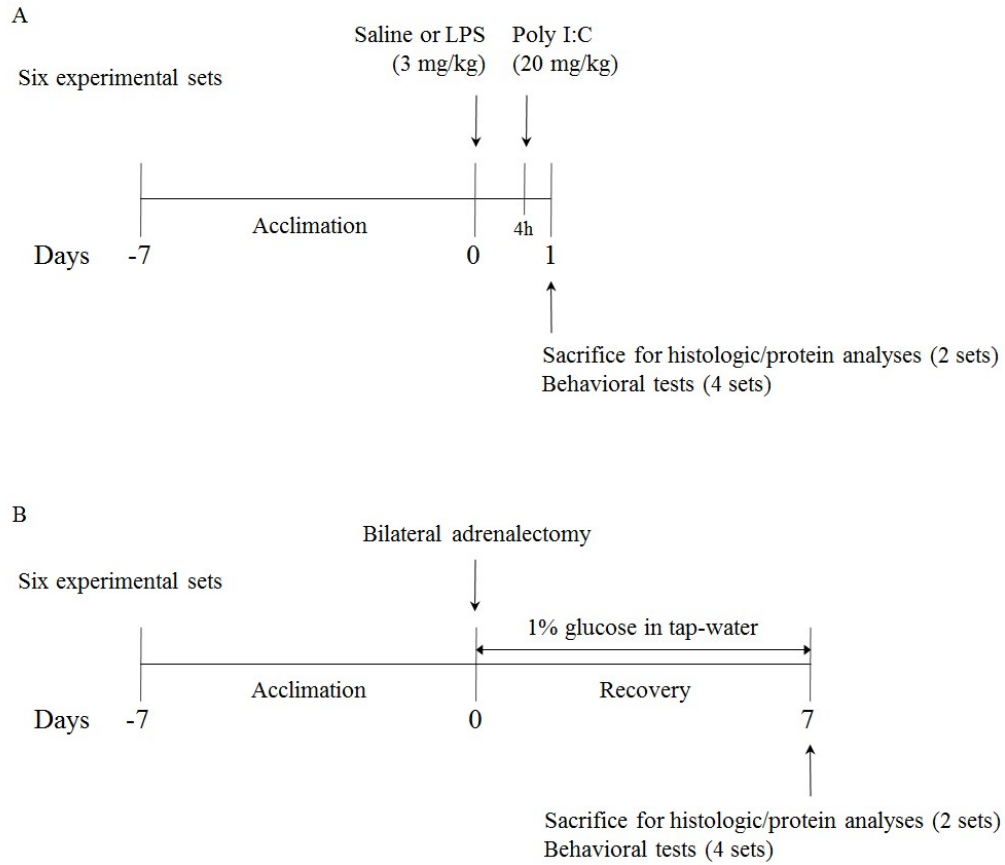

**Supplementary Figure S1. Experimental schedule.** ICR mouse (8 weeks old) was injected to LPS (3 mg/kg for 24 h) or poly I:C (20 mg/kg for 4 h) intraperitoneally (A). Other mice were subjected to bilateral adrenalectomy and then they were allowed to rest with 1% glucose for 7 days (B).

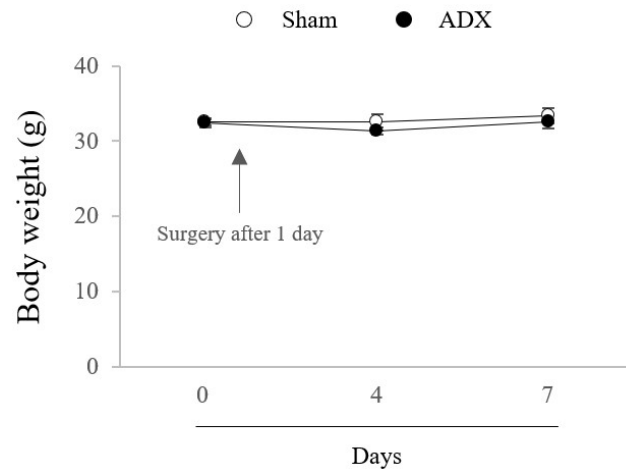

**Supplementary Figure S2. Changes in body weight of the sham or ADX mice during recovery.**

The body weight of sham (open circles) and ADX (filled circles) was measured during 7 days.

**Figure 5A full-length gel and blots**

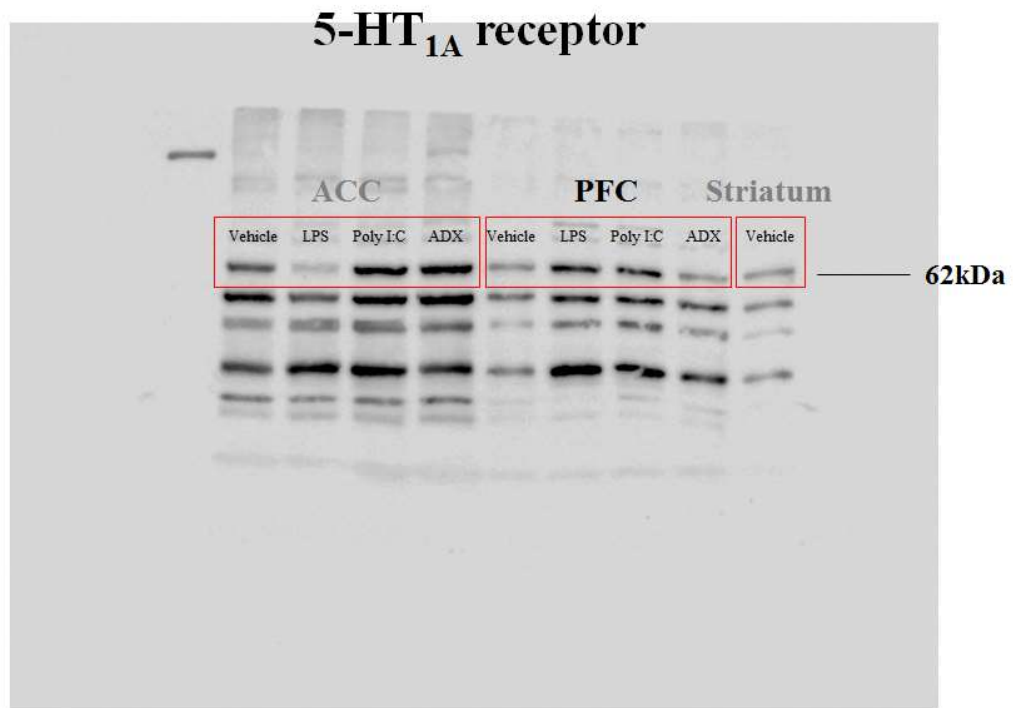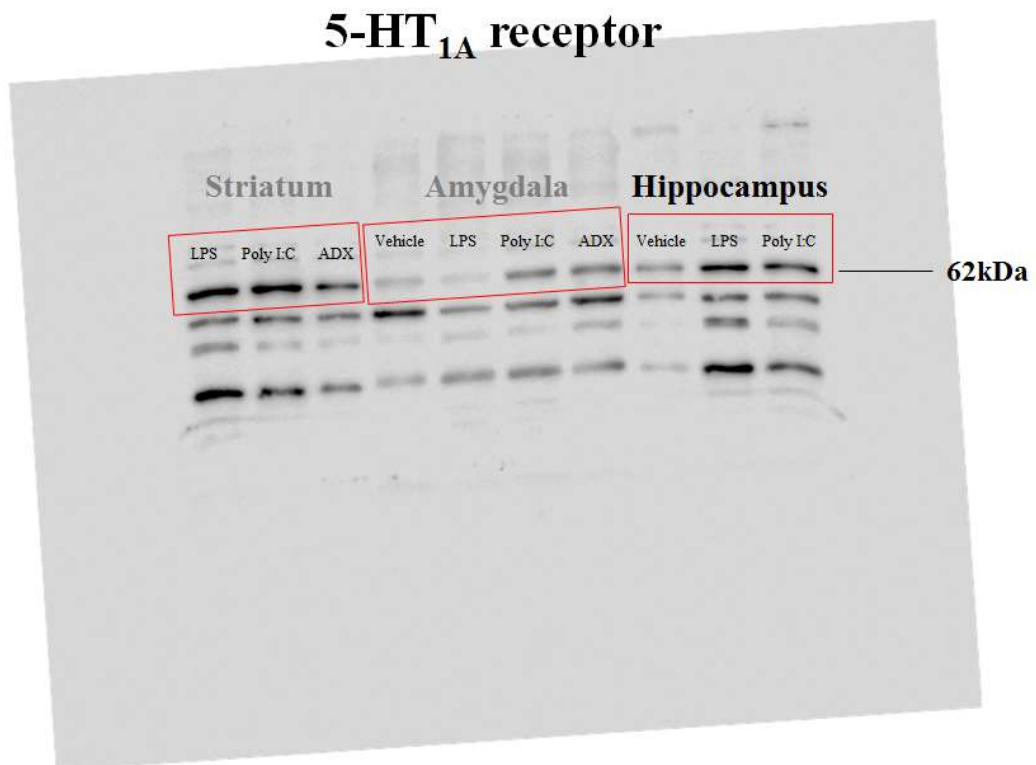

# 5-HT<sub>1A</sub> receptor

Hippocampus Hypothalamus

ADX Vehicle LPS Poly I:C ADX 62kDa

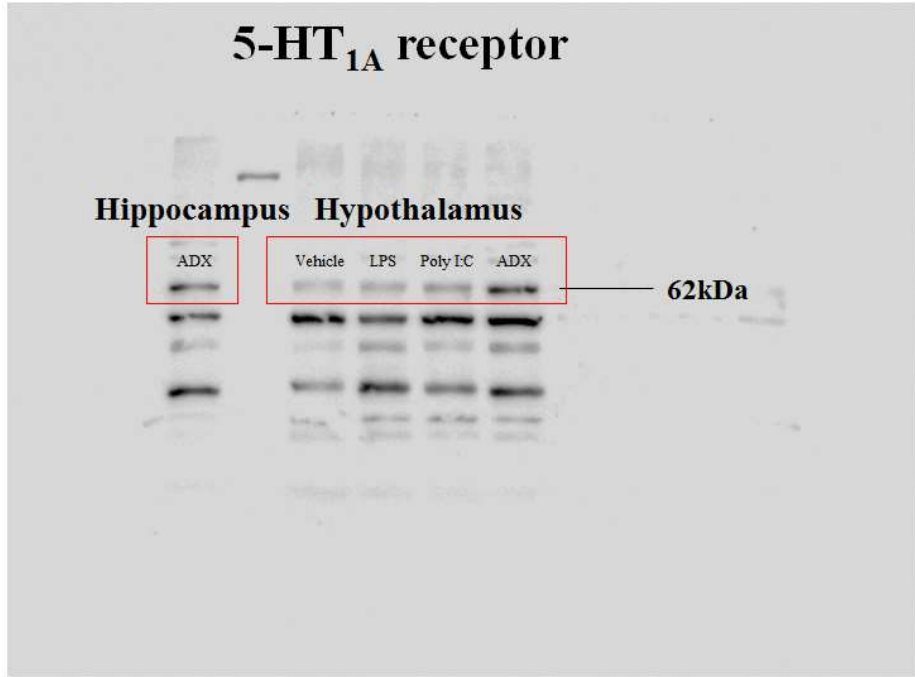

# 5-HT<sub>1A</sub> receptor

Raphe nuclei

Vehicle LPS Poly I:C ADX 62kDa

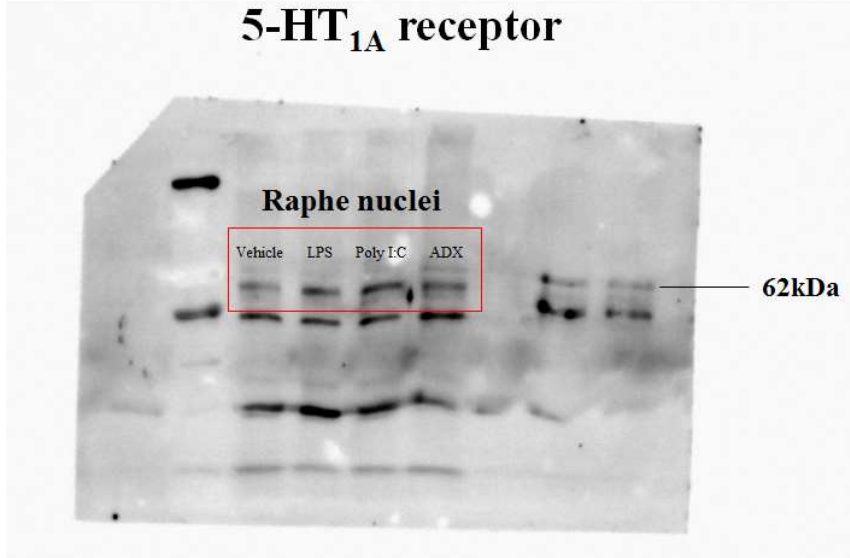

## 5-HT transporter

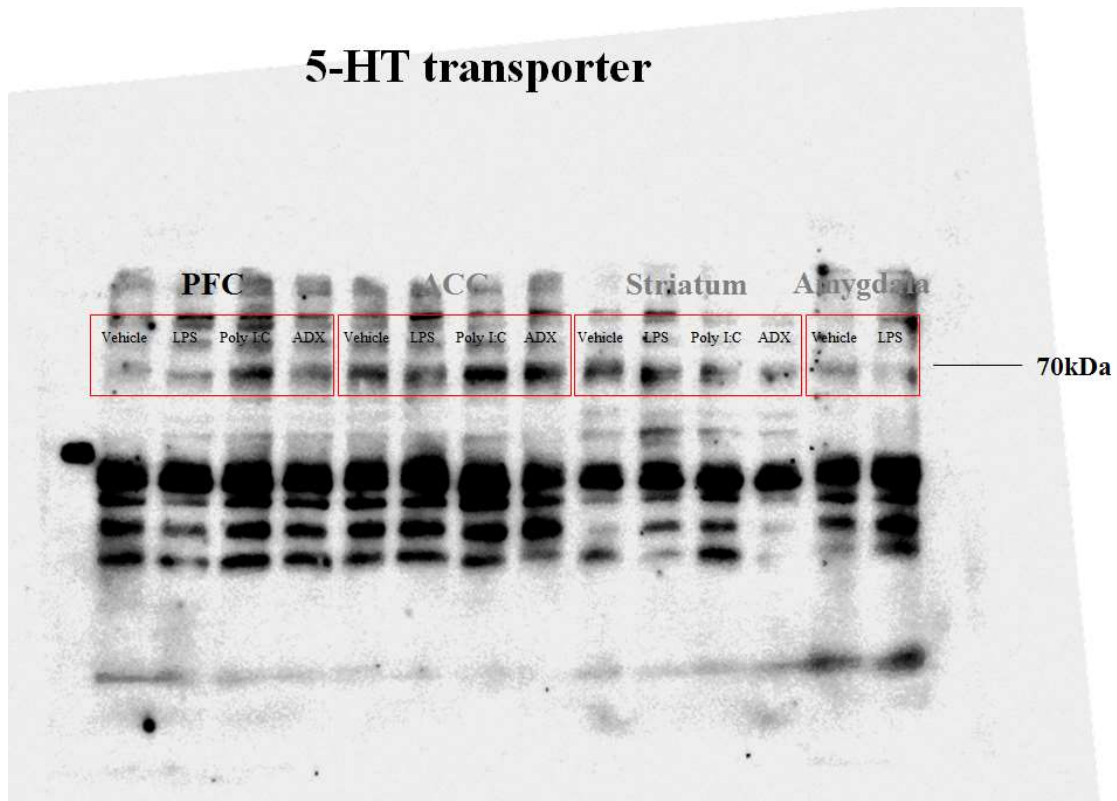

## 5-HT transporter

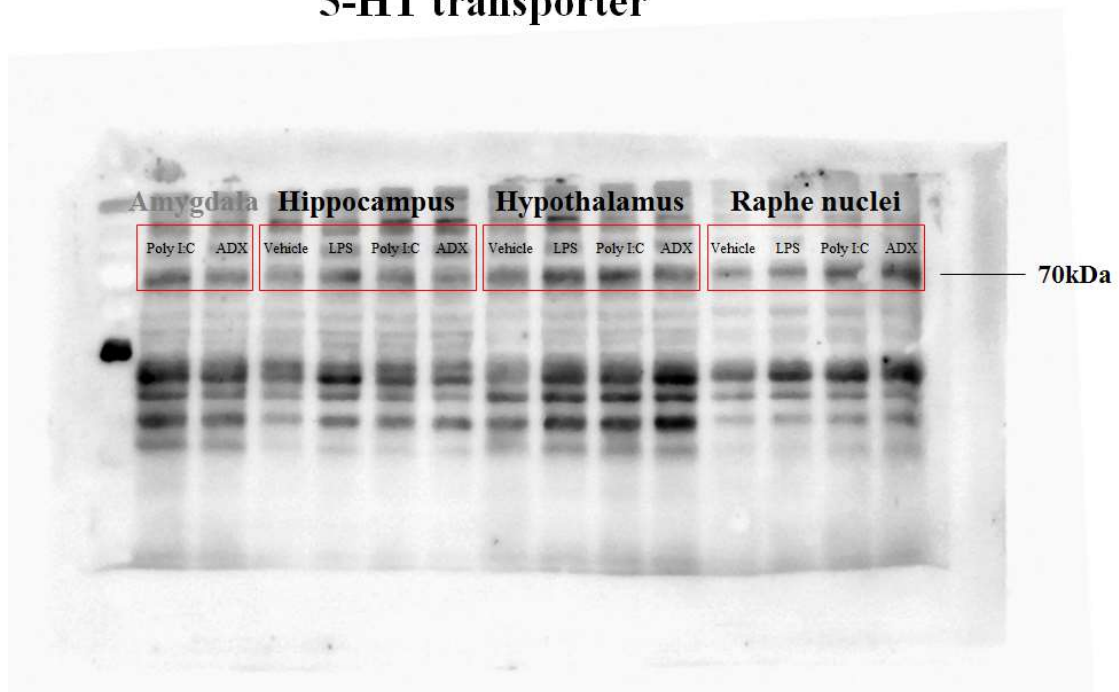

# $\beta$ -actin

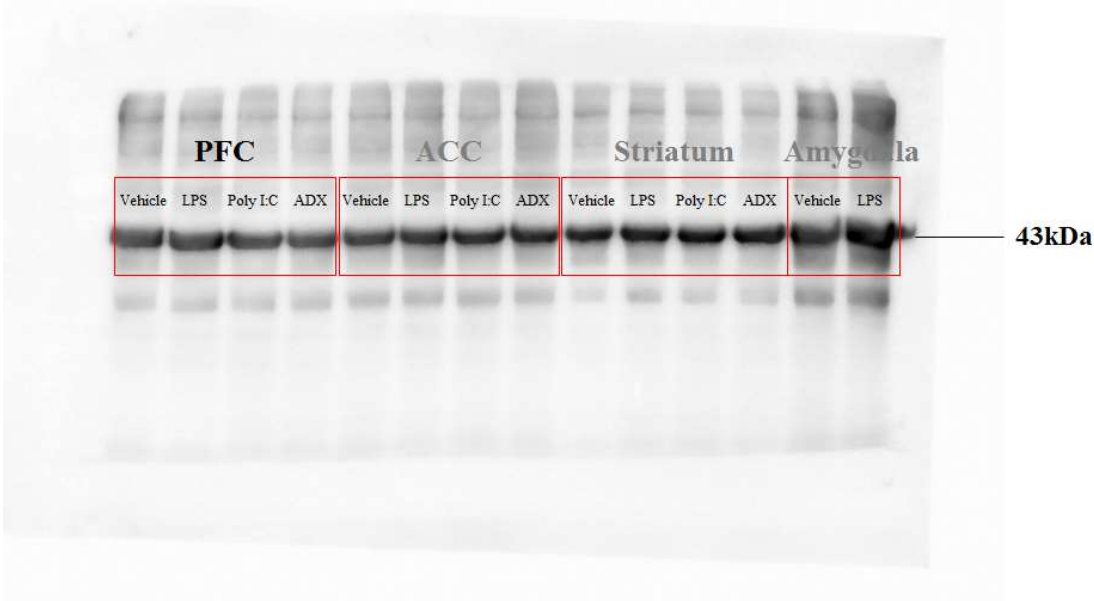

# $\beta$ -actin

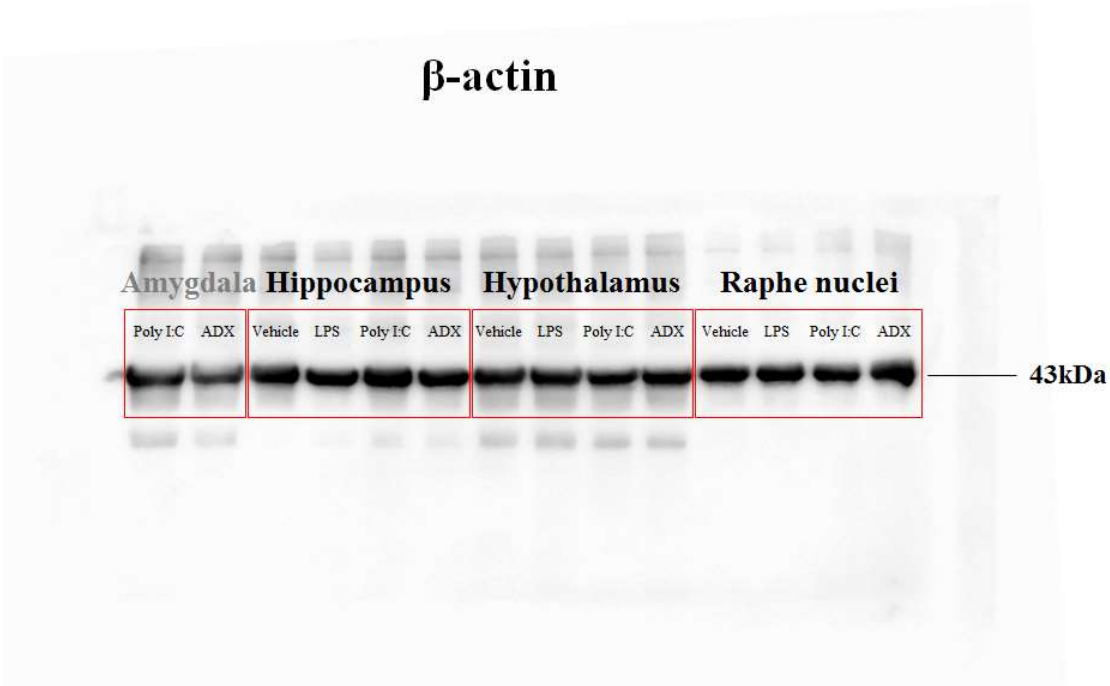

Supplement: biomolecules-10-00071-s001.pdf [file biomolecules-10-00071-s001.pdf]
